# Supplementary material for: Advantage of First-Line Therapeutic Drug Monitoring-Driven Use of Infliximab for Treating Acute Intestinal and Liver GVHD in Children: A Prospective, Single-Center Study
Source: MDPI journal article supplement (doi:10.3390/cancers15143605), 2023-07-13
Supplement: s1 [file s1]

**Supplementary Table S1.** Cytokines values in early and standard condition.

|                | Pre-infliximab |               | 1-7 days      |               | 8-21 days     |               | 22-40 days    |                | 41-80 days    |              | >81 days       |               |
|----------------|----------------|---------------|---------------|---------------|---------------|---------------|---------------|----------------|---------------|--------------|----------------|---------------|
|                | Early          | Standard      | Early         | Standard      | Early         | Standard      | Early         | Standard       | Early         | Standard     | Early          | Standard      |
| <b>b-FGF</b>   | 17,68±2,59     | 23,44±2,75    | 21,92±1,29    | 19,44±1,42    | 21,41±1,82    | 17,45±1,77    | 21,61±1,68    | 20,94±2,00     | 23,12±1,63    | 20,8±1,54    | 28,73±1,37     | 22,28±2,54    |
| <b>Eotaxin</b> | 82,33±32,39    | 67,74±27,08   | 89,17±20,55   | 67,32±21,28   | 88,43±24,21   | 115,80±36,96  | 67,84±18,59   | 123,40±32,33   | 60,52±15,86   | 112,80±47,99 | 46,36±3,62     | 34,60±3,83    |
| <b>G-CSF</b>   | 20,68±3,63     | 26,19±5,06    | 30,31±4,03    | 39,14±7,26    | 26,37±3,14    | 28,11±3,40    | 24,27±3,44    | 22,53±3,14     | 24,48±2,87    | 30,50±4,76   | 26,98±6,59     | 27,98±3,02    |
| <b>IFN-γ</b>   | 122,10±26,18   | 152,50±19,47  | 126,20±8,45   | 108,40±10,65  | 139,30±12,59  | 109,40±9,15   | 136,90±15,96  | 181,50±30,48   | 126,20±11,41  | 160,60±20,23 | 122,10±20,06   | 109,90±21,47  |
| <b>IL-1β</b>   | 7,59±1,10      | 8,60±1,59     | 16,36±4,06    | 13,70±2,48    | 11,69±2,03    | 9,32±2,22     | 9,73±1,82     | 11,20±2,62     | 11,74±2,21    | 12,11±2,19   | 12,12±4,79     | 10,53±2,98    |
| <b>IL-1ra</b>  | 743,30±68,29   | 836,00±66,48  | 597,20±57,20  | 839,50±125,60 | 623,10±47,49  | 644,60±46,27  | 637,70±71,23  | 660,80±54,20   | 657,90±50,98  | 769,10±75,21 | 705,60±63,42   | 605,90±60,56  |
| <b>IL-2</b>    | 24,81±1,61     | 27,97±2,52    | 34,89±2,93    | 34,01±2,25    | 29,57±2,34    | 26,07±1,54    | 31,38±2,05    | 29,31±2,70     | 30,11±3,18    | 28,76±1,59   | 35,51±6,95     | 32,42±5,05    |
| <b>IL-4</b>    | 22,89±3,01     | 21,29±3,18    | 19,86±2,39    | 15,17±1,31    | 22,41±2,14    | 22,53±1,99    | 19,04±2,22    | 26,48±1,86     | 19,87±2,20    | 22,62±2,19   | 20,15±4,33     | 21,49±1,27    |
| <b>IL-6</b>    | 71,52±12,85    | 98,02±14,60   | 59,86±17,34   | 71,06±11,91   | 44,61±7,14    | 66,20±9,62    | 80,59±17,33   | 87,42±22,45    | 56,15±9,64    | 75,46±20,08  | 53,49±6,03     | 64,15±7,65    |
| <b>IL-7</b>    | 19,36±2,63     | 17,65±3,21    | 14,70±1,88    | 9,14±1,30     | 18,14±2,62    | 11,71±2,13    | 15,55±2,57    | 16,59±2,83     | 14,47±2,37    | 18,03±3,13   | 17,12±5,85     | 10,40±2,63    |
| <b>IL-8</b>    | 28,69±1,79     | 27,45±2,44    | 30,47±1,81    | 28,36±1,39    | 28,87±1,92    | 28,04±2,30    | 28,26±2,63    | 26,27±2,73     | 27,25±2,29    | 29,28±1,39   | 27,83±2,21     | 29,20±3,03    |
| <b>IL-9</b>    | 12,01±2,23     | 12,56±2,10    | 15,35±1,23    | 13,15±0,87    | 17,99±2,47    | 22,23±6,01    | 17,19±1,59    | 27,35±8,67     | 18,33±1,83    | 16,96±1,36   | 15,44±0,91     | 17,58±1,93    |
| <b>IL12p70</b> | 32,23±1,91     | 34,28±2,50    | 35,72±1,87    | 36,02±1,80    | 36,68±2,00    | 35,68±1,74    | 36,13±2,01    | 35,38±2,64     | 37,90±1,92    | 33,43±1,43   | 32,84±2,50     | 34,58±3,13    |
| <b>IL13</b>    | 18,95±4,20     | 18,77±2,50    | 31,18±3,72    | 19,64±2,59    | 23,01±2,75    | 14,54±1,69    | 17,60±2,45    | 20,02±2,17     | 19,06±2,09    | 18,23±1,94   | 22,76±3,10     | 23,03±4,33    |
| <b>IL17</b>    | 73,51±11,14    | 98,88±14,51   | 77,93±6,31    | 64,58±4,03    | 92,56±9,42    | 80,68±9,85    | 69,15±7,21    | 97,77±11,56    | 77,44±9,75    | 90,68±10,39  | 95,47±21,43    | 74,89±11,62   |
| <b>IP10</b>    | 556,90±69,85   | 570,40±57,53  | 595,80±61,97  | 613,50±42,82  | 485,40±31,13  | 574,80±38,33  | 621,70±56,88  | 625,30±50,56   | 564,30±39,60  | 573,00±38,40 | 446,60±68,54   | 785,80±92,71  |
| <b>MCP1</b>    | 75,89±13,31    | 106,60±16,83  | 78,96±9,61    | 108,30±18,25  | 63,49±6,33    | 90,15±11,78   | 98,85±11,97   | 82,24±7,76     | 93,09±8,15    | 89,34±10,24  | 67,65±4,81     | 76,01±17,15   |
| <b>MIP1α</b>   | 7,11±0,53      | 8,25±1,63     | 6,08±0,64     | 4,75±0,50     | 5,79±0,63     | 4,91±0,67     | 4,98±0,60     | 7,25±0,87      | 5,60±0,73     | 5,69±0,44    | 5,46±0,77      | 5,17±0,63     |
| <b>MIP1β</b>   | 63,19±12,78    | 57,99±14,18   | 74,02±13,83   | 38,71±5,31    | 60,96±8,05    | 54,55±10,19   | 55,72±9,32    | 40,50±5,80     | 55,71±9,86    | 54,59±8,45   | 39,49±4,28     | 116,40±31,78  |
| <b>PDGF bb</b> | 455,90±127,20  | 745,90±204,00 | 673,70±162,70 | 760,80±115,40 | 767,60±159,20 | 930,70±209,20 | 694,10±231,50 | 1045,00±209,30 | 651,80±163,30 | 707,50±88,20 | 1038,00±248,40 | 875,00±338,40 |
| <b>TNF-α</b>   | 22,15±2,64     | 22,98±2,97    | 28,27±1,33    | 21,21±1,39    | 26,26±1,60    | 26,36±1,81    | 27,37±1,61    | 30,82±2,05     | 27,70±1,47    | 28,01±1,57   | 33,48±2,82     | 27,13±3,66    |

Mean±SE

**Supplementary Table S2.** Cytokine profile of healthy pediatric patients.

|                                | <b>Healthy Control Values</b> |
|--------------------------------|-------------------------------|
| <b>b-FGF</b>                   | 33,14±7,403                   |
| <b>Eotaxin</b>                 | 52,02±3,603                   |
| <b>G-CSF</b>                   | 13,70±2,556                   |
| <b>IFN-<math>\gamma</math></b> | 71,96±9,744                   |
| <b>IL-1<math>\beta</math></b>  | 4,667±1,344                   |
| <b>IL-1ra</b>                  | 140,5±7.398                   |
| <b>IL-2</b>                    | 5,031±0.672                   |
| <b>IL-4</b>                    | 1,880±0,231                   |
| <b>IL-6</b>                    | 6,004±0.812                   |
| <b>IL-7</b>                    | 5,688±0,619                   |
| <b>IL-8</b>                    | 10,29±1.995                   |
| <b>IL-9</b>                    | 14,54±3.842                   |
| <b>IL12p70</b>                 | 28,46±2.096                   |
| <b>IL13</b>                    | 5,889±1,078                   |
| <b>IL17</b>                    | 41,36±10,68                   |
| <b>IP10</b>                    | 163,4±6.549                   |
| <b>MCP1</b>                    | 57,37±14.13                   |
| <b>MIP1<math>\alpha</math></b> | 3,952±0,825                   |
| <b>MIP1<math>\beta</math></b>  | 23,68±2,384                   |
| <b>PDGF bb</b>                 | 253,4±44,40                   |
| <b>TNF-<math>\alpha</math></b> | 13,47±1,367                   |

Mean±SE
